# Supplementary material for: Schmerzregister und verwandte Datensammlungen
Source: Springer Nature journal article supplement (doi:10.1007/s00482-016-0118-5), 2016-06-28
Supplement: MOESM1 [file 10293534]

## Sheet: Tabelle 2_Schmerzregister-Items
Tab. 2: Gefundene Register und registerähnliche Datensammlungen mit PRO-Schmerzparametern: Detail-Übersicht über erhobene Items
Lfd. Nr.	1	2	3	4	5	6	7	8	9	10	11	12	13	14	15	16	17	18	19	20	21	22	23
Akronym:	KEDOQ Schmerz	painDETECT	PainPool	PraxisRegister Schmerzdokumentation	QUAST	HOPE	NRA	QUIPS	ActiFE-Ulm	Herniamed	BIKER	ICON	JuMBO	Kerndokumentation Rheuma (Erwachsene)	Kerndokumentation rheumakranker Kinder und Jugendlicher	DVSE	Wirbelsäulenregister	OSG-TEP	SWISSspine	SHIP	AMLSG	CAESAR	OVIS
Datenquelle:	KEDOQ Schmerz (KErnDOkumentation und Qualitätssicherung in der Schmerztherapie)	painDETECT	PainPool-SchmerznetzNRW UG	DGS-PraxisRegister Schmerz	QUAST (Qualitätssicherung in der Schmerztherapie)	HOPE (Hospiz- und Palliativ-Erfassung Standarddokumentation)	Netzwerkes zur Sicherheit in der Regionalanästhesie (NRA) in Deutschland	QUIPS	ActiFE-Ulm -Studie (Auswirkung von körperlicher Aktivität auf den Alterungsprozess)	Herniamed	BIKER-Register (Biologika in der Kinderrheumatologie-Register)	Frühkohorte juvenile idiopathische Arthritis ICON (Inception cohort of newly diagnosed patients with JIA)	JuMBO (Langzeitbeobachtung Biologika / MTX bei juveniler Arthritis)	Kerndokumentation Rheuma (Erwachsene)	Kerndokumentation rheumakranker Kinder und Jugendlicher	DVSE Schulter- und Ellenbogen-prothesenregister Deutschland	DWG-Register (Wirbelsäulenregister)	OSG-TEP-Register der D.A.F. (Register für Sprunggelenkendoprothesen)	SWISSspine (schweizerisches Register für Wirbelsäulenimplantate)	SHIP (Study of Health in Pomerania) SHIP-Basisstudie sowie SHIP-Trend	Registry Study on Biological Disease Profile and Clinical Outcome in Acute Myeloid Leukemia and Related Neoplasms and Acute Leukemias of Ambiguous Lineage – The AMLSG Biology and Outcome (BiO)-Project	CAESAR-Studie (Lebensqualität von Langzeitüberlebenden nach Brust-, Darm- und Prostatakrebs)	OVIS-Studie (medizinischen Versorgung von Patienten/innen mit Mammakarzinom, Prostatakarzinom oder malignem Melanom in Schleswig-Holstein)
Kontakt:	Dr. Bernd Nagel (Sprecher) DRK Schmerz-Zentrum Mainz Auf der Steig 16 55131 Mainz	Prof. Dr. Dr. Thomas R. Tölle Neurologische Klinik Klinikum rechts der Isar, Technische Universität München Ismaninger Str. 22 81675 München	Dr. Klaus Strick Dr. Hildegard Schneider-Nutz Dr. Kamal Salem René-Magritte-Promenade 11 50858 Köln	Dr. Gerhard Müller-Schwefe Präsident der Deutschen Gesellschaft für Schmerzmedizin e.V. Schillerplatz 8/1 733033 Göppingen	Prof. Dr. Christoph Maier Berufsgenossenschaftl. Universitätsklinikum Bergmannsheil 44702 Bochum	Deutsche Gesellschaft für Palliativmedizin e.V. Aachener Str. 5 10713 Berlin	Prof. Dr. med. Thomas Volk Universitätsklinikum des Saarlandes und Medizinische Fakultät der Universität des Saarlandes, Klinik für Anästhesiologie, Intensivmedizin und Schmerztherapie Gebäude 57 66421 Homburg	Prof. Dr. Winfried Meißner Schmerzambulanz Klinik für Anästhesiologie und Intensivtherapie Universitätsklinikum Jena Erlanger Allee 101 07747 Jena	PD Dr. med. Michael Denkinger Agaplesion Bethesda Klinik Ulm gGmbH Zollernring 26 89073 Ulm	Prof. Dr. Ferdinand Köckerling Vivantes Klinikum Spandau Klinik für Chirurgie - Visceral- und Gefäßchirurgie Neue Bergstraße 6 13585 Berlin	Prof Dr. Gerd Horneff Asklepios Klinik Sankt Augustin Zentrum für Allgemien Pädiatrie und Neonatologie Arnold -Janssen-Str. 29 53757 Sankt Augustin	PD Dr. Kirsten Minden Deutsches Rheuma-Forschungszentrum Berlin (DRFZ) Programmbereich Epidmiologie AG Kinder- und Jugendrheuamtologie Charité - Universitätsmedizin Berlin, Campus Mitte 10117 Berlin	PD Dr. Kirsten Minden Deutsches Rheuma-Forschungszentrum Berlin (DRFZ) Programmbereich Epidmiologie AG Kinder- und Jugendrheuamtologie Charité - Universitätsmedizin Berlin, Campus Mitte 10117 Berlin	Fr. Prof. Dr. A. Zink Deutsches Rheuma-Forschungszentrum Berlin, ein Leibniz Institut [DRFZ] Charitéplatz 1 10117 Berlin http://www.drfz.de	PD Dr. Kirsten Minden Deutsches Rheuma-Forschungszentrum Berlin (DRFZ) Programmbereich Epidmiologie AG Kinder- und Jugendrheuamtologie Charité - Universitätsmedizin Berlin, Campus Mitte 10117 Berlin	Deutsche Vereinigung für Schulter- und Ellenbogenchirurgie e.V. (DVSE) Dr. Petra Magosch (Schulterprothesenregister) Bismarckstr. 9-15 69115 Heidelberg PD Dr. Klaus Burkhart (Ellenbogenprothesenregister) Rastatter Str. 17-19 75179 Pforzheim	Dr. Frerk Meyer Leiter Kommission Wirbelsäulenregister Deutsche Wirbelsäulengesellschaft c./o. Abt. f Wirbelsäulenchirurgie Universitätsklinik für Neurochirurgie Evangelischeskrankenhaus Oldenburg Steinweg 13 26122 Oldenburg	Dr. Tanja Kostuj Katholisches Klinikum Bochum – St. Josef Hospital (UKRUB) Gudrunstraße 56 44791 Bochum	Prof. Dr. med Christoph Röder, MPH Institutsleiter MEM Forschungszentrum Institut für Evaluative Forschung in Medizin Universität Bern Stauffacherstr. 78 CH-3014 Bern	Prof. Dr. Henry Völzke Universitätsmedizin Greifswald Institut für Community Medicine Forschungsverbund Community Medicine Walther Rathenau Str. 48 17475 Greifswald	Prof. Dr. RF Schlenk Klinik für Innere Medizin III Universitätsklinikum Ulm Albert-Einstein-Allee 23 D-89081 Ulm	PD Dr. Volker Arndt Deutsches Krebsforschungszentrum Heidelberg (dkfz) Im Neuenheimer Feld 581 69120 Heidelberg	Prof. Dr. Katalinic Institut für Krebsepidemiologie Ratzeburger Allee 160 (Haus 50) 23562 Lübeck
Organisationseinheit:	Deutsche Schmerzgesellschaft e.V Ad hoc Kommission KEDOQ-Schmerz	Deutsche Forschungsverbund Neuropathischer Schmerz (DFNS) in Zusammenarbeit mit Pfizer Pharma GmbH	PainPool-Schmerznetz NRW	Deutsche Gesellschaft für Schmerzmedizin e.V. Adenauerallee 18, 61440 Oberursel	DGSS (Deutsche Gesellschaft zum Studium des Schmerzes)	Deutsche Gesellschaft für Palliativmedizin (DGP)	Netzwerk Regionalanästhesie	Klinik für Anästhesiologie und Intensivtherapie, Universitätsklinikum Jena	Agaplesion Bethesda Klinik Ulm gGmbH	Tel.: 0 30 130 13 2151	Kinderrheumazentrum Sankt Augustin Asklepios Klinik Sankt Augustin	DRFZ: Programmbereich Epidmiologie AG Kinder- und Jugendrheuamtologie	DRFZ: Programmbereich Epidmiologie AG Kinder- und Jugendrheuamtologie	Forschungsbereich Epidemiologie rheumatischer Erkrankungen	DRFZ: Programmbereich Epidmiologie AG Kinder- und Jugendrheuamtologie	Deutsche Vereinigung für Schulter- und Ellenbogenchirurgie e.V. (DVSE)	Deutsche Wirbelsäulengesellschaft, DWG	Katholisches Klinikum Bochum – St. Josef Hospital (UKRUB)	Universität Bern MEM Forschungszentrum	Universitätsmedizin Greifswald Institut für Community Medicine	Universitätsklinikum Ulm	Deutsches Krebsforschungszentrum	Institut für Krebsepidemiologie, Lübeck
Telefon:	Tel: 06131 988 951	Tel: 089 4140 7915	k.A.	Tel.: 06171 28600 Fax: 06171 286069	Tel: 0234 302 6366	Tel.: 030 3010100-1	Tel: 06841 1622485	Tel: 03641 9323298 (Marcus Komann) Tel: 03641 9323354 (Antje Göttermann) Tel: 03641 9323158 (Claudia Weinmann)	Tel: 0731 187 0	ferdinand.koeckerling@vivantes.de	Tel: 02241240201	Tel: 030 28460632	Tel: 030 28460632	Tel: 030 28460622	Tel: 030 28460632	Tel.: 06221 983 123 (Dr. P. Magusch) Tel.: 07231 605560 (PD Dr. K. Burkhart)	Tel: 0441 236 257	Tel: 0234 509 6500	Tel: 0041 31 6315932	Tel.: 03834 867541	Tel: 0731 500 45900	Tel: 06221 421301	Tel: 045 1005440
E-Mail:	bernd.nagel@drk-schmerz-zentrum.de	dfns@lrz.tu-muenchen.de	info@schmerznetznrw.org	info@dgschmerzmedizin.de	christoph.maier@ruhr-uni-bochum.de	register@dgpalliativmedizin.de koordination@palliativmedizin.de	thomas.volk@uks.eu	quips@med.uni-jena.de	Regine.faul@bethesda-ulm.de	Herniamed GmbH	g.horneff@asklepios.com	minden@drfz.de	minden@drfz.de	zink@DRFZ.de	minden@drfz.de	petra.magosch@atos.de burkhart@sportklinik.de	f.meyer@dwg.org	t.kostuj@klinikum-bochum.de	christoph.roeder@memcenter.unibe.ch	voelzke@uni-greifswald.de	richard.schlenk@uniklinik-ulm.de	v.arndt@dkfz.de	Alexander.Katalinic@uksh.de
Träger/Förderer:	Deutsche Schmerzgesellschaft e.V	Pfizer Pharma GmbH	selbst (PainPool-Schmerznetz NRW)	Deutsche Gesellschaft für Schmerzmedizin e.V.	DGSS (Deutsche Gesellschaft zum Studium des Schmerzes)	Deutscher Hospiz- und Palliativ Verband (DHPV) gemeinsam mit der Deutschen Krebsgesellschaft und der Deutschen Gesellschaft für Palliativmedizin	DGAI (Deutsche Gesellschaft für Anästhesie und Intensivmedizin e.V.) BDA (Berufsverband deutscher Anästhesisten)	Schirmherrschaft des Projekts: Präsidien der Deutschen Gesellschaft für Anästhesiologie und Intensivmedizin (DGAI) und des Berufsverbandes Deutscher Anästhesisten (BDA); Kooperationspartner: Deutsche Gesellschaft für Chirurgie (DGCH), Berufsverband Deutscher Chirurgen (BDC) und Österreichische Gesellschaft für Anästhesiologie, Reanimation und Intensivmedizin (ÖGARI)	Land Baden-Württemberg EU	Qualitätsverbesserung der Patientenversorgung in der Hernienchirurgie und Lieferung valider Daten für die Versorgungsforschung	keine detaillierte Angabe (verschiedene Träger)	Träger: DRFZ Finanzierung erfolgt durch das BMBF	Träger: DRFZ Finanzierung erfolgt durch ein unconditional grant der Firmen Pfizer und Abbvie	1993-1999 Förderung im Rahmen der wissenschaftlichen Begleitung des Modellvorhabens zum Aufbau regionaler Rheumazentren durch das Bundesministerium für Gesundheit 1999-31.12.2007 Förderung im Rahmen der Versorgungsforschung des Kompetenznetzes Rheuma durch den Bundesminister für Bildung und Forschung seit 01.01.2007 Förderung durch die Arbeitsgemeinschaft der Rheumazentren sowie ein Konsortium vo…	Träger: DRFZ Finanzierung erfolgt durch die Deutsche Kinderrheumastiftung, München	Frühzeitige Erkennung problematischer Prothesentypen Standzeiten und klinische Ergebnisse von Schulter- und Ellenbogenendoprothesen	Deutsche Wirbelsäulengesellschaft	Deutsche Assoziation für Fuß und Sprunggelenk e.V.	SGS Schweizerische Gesellschaft für Spinale Chirurgie. Förderer: Industriepartner, FASMED (Kontakt: claudia.meier@mepartners.ch)	Diverse Förderer während der Laufzeit: BMBF, DFG, BMELV, Landesförderungen, u.a.	Universitätsklinikum Ulm	Deutsche Krebshilfe	Deutsche Krebshilfe
Kurzbeschreibung:	Etablierung eines sektorenübergreifenden, bundesweiten standardisierten Datensatzes mit definierten Erhebungszeitpunkten in der spezialisierten Schmerztherapie	Multizentrische Langzeiterhebung zur Schmerzcharakteristik in der deutschen Bevölkerung	Schmerzdokumentation	Sammlung von Daten von Schmerzpatienten mit Hilfe des online-Dokumentationssystem iDocLive®	Dokumentation und Qualitätssicherung in der Schmerztherapie	Versorgungsalltag von Palliativpatienten	Sicherheit in der Regionalanästhesie und Akutschmerztherapie	Postoperativen Symptomkontrolle	Longitudinale popoulationsbasierte Kohorte zur Auswirkung von körperlicher Aktivität auf den Alterungsprozess und assoziierten Fragestellung.	Patientenversorgung in der Hernienchirugie	Sicherheit und Wirksamkeit der Therapie der JIA mit Biologika	Beurteilung des Krankheitsverlauf bei der JIA nach 3, 6 und 9 Jahren	Langzeitsicherheit, Langzeitwirksamkeit und Kosten einer Biologika-Behandlung im Vergleich zu einer konventionellen Basistherapie bei der JIA	Diagnosen, Behandlung und klinischer Zustand rheumatologisch betreuter Patienten	Versorgungssituation und gesundheitliches Befinden von Kindern und Jugendlichen mit immunvermittelten rheumatischen Erkrankungen	Standzeiten und klinische Ergebnisse von Schulter- und Ellenbogenendoprothesen sowie frühzeitige Erkennung problematischer Prothesentypen	Operativ und nichtoperativ behandelte Erkrankungen der Wirbelsäule	Outcome zur Endoprothetik des Sprunggelenkes	Operativen Wirbelsäulenbehandlungen mit Bandscheibenprothesen, Ballonkyphoplastie, interspinösen Spacern, posterioren dynamischen Stabilisationssystemen	Analyse der Begriffe "Gesundheit" und "Krankheit" in Zusammenhang mit Risikofaktoren, subklinischer Auffälligkeiten und manifester Erkrankungen	Lebensqualität von Patienten mit akuter myeloischer Leukämie	Lebensqualität von Langzeitüberlebenden (> 5 Jahre nach Erstdiagnose) nach Brust-, Darm- und Prostatakrebs	Onkologische Versorgung von Patientinnen mit Mammakarzinom, Patienten mit Prostatakarzinom und Personen mit malignem Melanom
Erhebungszweck:	Etablierung eines sektorenübergreifenden (ambulant, teil/stationär), bundesweiten standardisierten Datensatzes (Baseline, Therapieende, Follow-up) mit definierten Erhebungszeitpunkten in der spezialisierten Schmerztherapie Zielsetzung: · Aufbau einer externen Qualitätssicherung mit Benchmark durch ad hoc Abbildungen der multizentrischen Daten Schaffung einer soliden Datenbasis für Versorgungsfors…	painDETECT® ist ein wissenschaftlich fundiertes und einfach zu bedienendes Programm zum Schmerzscreening und Schmerzdokumentation in Praxis und Klinik. Das Programm unterstützt die Anamnese und Diagnosestellung, unterstützt bei der Identifikation neuropathischer Schmerzkomponenten, bindet Patienten aktiv mit ein (selbstständige Beantwortung des Fragebogens im Wartezimmer), wertet die Antworten un…	Schmerzdokumentation nach QSV §135 SGB V Versorgungsforschung	Sammlung systematischer Informationen über die wesentlichen demographischen und schmerzmedizinisch relevanten Daten; Unterstützung schmerzmedizinisch tätiger Einrichtungen bei der Umsetzung eines Schmerzdokumentationssystems; Sammlung von Angaben zu Häufigkeit, Wirksamkeit und Sicherheit/Verträglichkeit medikamentöser wie nichtmedikamentöser Behandlungsverfahren der täglichen Praxis; externe Qual…	QUAST ist ein auswertungsorientiertes EDV-System zur Dokumentation und Qualitätssicherung der Schmerztherapie; QUAST ist modular konzipiert und ermöglicht: Organisation und Dokumentation der tgl. Arbeit, interne Leistungsstatistik, Vereinfachung von Arbeitsabläufen, Aufbau einer externen Qualitätssicherung der Schmerztherapie; Vernetzung von verschiedenen Schmerzzentren	Zusammenführung patientenbezogener Daten aus dem Versorgungsalltag der Hospiz- und Palliativversorgung; Qualitätsbeschreibung der Hospiz- und Palliativversorgung; Weiterentwicklung der Versorgung von Palliativpatienten	Prospektive Erhebung epidemiologischer Daten zur Sicherheit von Regionalanästhesie, insbes. zu Infektionen und neurologischen Schäden; Identifikation von Risikofaktoren für die Entwicklung von Komplikationen; Identifikation notwendiger Prozesse im Rahmen der Sicherheits-Optimierung	Verbesserung der postoperativen Symptomkontrolle durch eine regelmäßige Erhebung von Parametern der Ergebnisqualität, ihre Analyse und Rückmeldung an die beteiligten Kliniken.	Longitudinale popoulationsbasierte Kohorte zur Auswirkung von körperlicher Aktivität auf den Alterungsprozess und assoziierten Fragestellung. Besonderheit: Sensor-basierte körperliche Aktivität über 1 Woche bei Baseline bestimmt	Das internetbasierte Qualitätssicherungsprogramm für die Hernienchirurgie (Leistenhernien, Nabelhernien, Narbenhernien, epigastrische Hernien, parastomale Hernien und Hiatushernien) soll die Qualität der Patientenversorgung verbessern und valide Daten für die Versorgungsforschung liefern.	Surveillance von Sicherheit und Wirksamkeit der Therapie der JIA mit Biologika	Multizentrische prospektive kontrollierte Kohortenstudie mit neu an juveniler idiopathischer Arthritis (JIA) erkrankten Kinder/Jugendliche und Kontrollkindern. Regelmäßige Untersuchungen und Befragungen der Patienten mit dem Ziel nach 3, 6 und 9 Jahren den Verlauf der Erkrankung zu beurteilen, u.a. mit Erfassung von Folgeschäden sowie der Lebensqualität.	Langzeitbeobachtung von Patienten mit juveniler idiopathischer Arthritis (JIA), die vormals im Biologika-Kinder-Register BiKeR eingeschlossen waren, nach Erreichen des Erwachsenenalters bzw. Abschluss der kinderrheumatologischen Betreuung. Ziel ist die Ermittlung der Langzeitsicherheit, Langzeitwirksamkeit und Kosten einer Biologika-Behandlung im Vergleich zu einer konventionellen Basistherapie b…	Die Kerndokumentation der Rheumazentren liefert jährliche Daten über Diagnosen, Behandlung und klinischen Zustand rheumatologisch betreuter Patienten.	Die Kinder-Kerndokumentation liefert repräsentative Daten zur Versorgungssituation und zum gesundheitlichen Befinden von Kindern und Jugendlichen mit immunvermittelten rheumatischen Erkrankungen.	Frühzeitige Erkennung problematischer Prothesentypen Standzeiten und klinische Ergebnisse von Schulter- und Ellenbogenendoprothesen	Krankheits- und Prozeduren bezogenes Register zur Beschreibung des input-thruput-output-outcome von operativ und nichtoperativ behandelten Erkrankungen der Wirbelsäule	Outcome zur Endoprothetik des Sprunggelenkes	Schweizerisches Register zur Erfassung von operativen Wirbelsäulenbehandlungen mit Bandscheibenprothesen, Ballonkyphoplastie, interspinösen Spacern, posterioren dynamischen Stabilisationssystemen	Abklärung der Prävalenz und Inzidenz häufiger Risikofaktoren, subklinischer Auffälligkeiten und manifester Erkrankungen zum besseren Verständnis der Morbidität und Mortalität von Teilen der Bevölkerung in Mecklenburg-Vorpommern; Analyse der Zusammenhänge zwischen Risikofaktoren, subklinischen Auffälligkeiten und manifesten Erkrankungen - Erfassung der Begriffe „Gesundheit“ und „Krankheit“ mit ein…	Erfassung der Lebensqualität aller teilnehmenden Patienten mit akuter myeloischer Leukämie (EORTC QLQ-C-30) im Rahmen der Studie CLINICAL OUTCOME IN OLDER AML PATIENTS NOT FIT FOR INTENSIVE CHEMOTHERAPY: RESULTS OF THE POPULATION-BASED AMLSG-BIO (NCT01252485) REGISTRY STUDY OF THE GERMAN-AUSTRIAN AML STUDY GROUP.	Die CAESAR-Studie hat das Ziel die Lebensqualität bei Langzeitüberlebenden (>5 Jahre nach Erstdiagnose) nach Brust-, Darm- und Prostatakrebs zu untersuchen.	Beschreibung der onkologischen Versorgung von Patientinnen mit Mammakarzinom, Patienten mit Prostatakarzinom und Personen mit malignem Melanom
Datenerheber:	Praxen, Ambulanzen und (teil-)stationäre Einrichtungen in der spezialisierten Schmerztherapie	Ärzte in beteiligten Kliniken und Praxen	PainPool Nutzer	beteiligte Ärzte, schmerzmedizinische Einrichtungen	beteiligte schmerztherapeutische Institutionen (wie Universitätsambulanzen, Kliniken, Praxen); Probephase: Kiel, danach versch. Zentren	Palliativ- und onkologische Stationen, stationäre Hospize, Konsiliardienste sowie ambulante Palliativteams	beteiligte Zentren / klinische Routine	teilnehmende Kliniken	Interview-basiert (Study-Nurses und Ärzte)	Ärzte der teilnehmenden Kliniken und Praxen	Ärzte in 75 Einrichtungen		Insgesamt erheben über 250 Einrichtungen (ca. 70 kinderrheumatologische Praxen und Klinikambulanzen sowie 180 erwachsenenmedizinische Einrichtungen) Daten.	regionale Rheumazentren (etwa 20 Einrichtungen)	bundesweit in über 60 kinderrheumatologische Einrichtungen	implantierende Abteilungen, nachbehandelnde Ärzte	beteiligte Institutionen	implantierender Arzt oder einer seiner Mitarbeiter	beteiligte Kliniken in der Schweiz	Institut für Community Medicine als Bestandteil vom Forschungsverbund Community Medicine	Erhebung der Daten durch die AMLSG-Studienzentrale	Selbstangaben wurden über Fragebögen erhoben, die von den kooperierenden Krebsregistern bzw. Studienzentren versendet wurden.	Datenerhebung mittels Fragebogen des Instituts für Krebsepidemiologie
Kreis der Befragten:	Patienten mit chronischen Schmerzen, die in der Routineversorgung obige Einrichtungen aufsuchen	Patienten	Patienten surveys, Nachbearbeitung durch pain nurses, Doktores	Schmerzpatienten	Behandler in schmerztherapeutischen Einrichtungen	Baisifragebogen für Behandler, Selbsterfassungsboden für Patient, Woche (Verlauf-)bogen, Bogen zur Wundversorgung	Patienten	Patienten nach OP in Klinik	Zu Hause lebende ältere Personen 65-90 Jahre bei Baseline (2009)	Operateure und Patienten	Ärzte und Patienten/Eltern	Neben der ärztlichen Dokumentation erfolgt auch eine Befragung der Eltern und Patienten (ab 5 Jahre) und der Kontrollfamilien.	Neben der ärztlichen Dokumentation erfolgt auch eine Befragung der Patienten.	Patienten mit entzündlich-rheumatischen Krankheiten.	Neben der ärztlichen Dokumentation erfolgt auch eine Befragung der Eltern bzw. bei Patienten über 13 Jahre, der Jugendlichen selbst.	Patienten	Patienten	Patienten vor und nach Implantation einer Sprunggelenkendoprothese	Ärzte und Patienten	Erwachsene deutsche Allgemeinbevölkerung mit Erstwohnsitz in den Landkreisen Ost- und Nordvorpommern und der kreisfreien Städte Greifswald und Stralsund, die zum Zeitpunkt der Stichprobenauswahl 20-79 Jahre alt waren.	Patienten mit akuter myeloischer Leukämie	Bevölkerungsbezogene Stichprobe von Langzeitüberlebenden nach Brust-, Darm- und Prostatakrebs: Die Teilnehmer wurden über die beteiligten Krebsregister (Schleswig-Holstein, Hamburg, Bremen, Münster/NRW, Rheinland-Pfalz und Saarland) identifiziert.	Patientinnen mit Mammakarzinom, Patienten mit Prostatakarzinom und Personen mit malignem Melanom in Schlwswig-Holstein (zw. 2002-2005)
Erhebungsinstrumente:	Deutscher Schmerzfragebogen (DSF) und Verlaufsfragebogen der Deutschen Schmerzgesellschaft (inkl. Daten zur sozialen Situation, Demographie, SBL, FW7, Schwereindex nach VonKorff, DASS, SF-12 (wird vom VR-12 abgelöst)) Stadium der Schmerzchronifizierung (MPSS) Hauptschmerzlokalisation Somatische und psychologische Diagnostik zu Art und Umfang der durchgeführten Therapie entsprechend den Vorgaben d…	Angst und Depression (PHQ-D), Generalisierte Angststörung (GAD 7), Neuropathie bei Diabetes, Pain Detect Questionnaire (PD-Q), MOS-Sleep Scale (Spitzer/Hays), Mainzer Stadienmodell der Schmerz-Chronifizierung (MPSS), Funktionalitätsfragebogen Hannover (FFbH), Ulcus-Risiko-Kalkulator, Disease Activity Score (DAS28), Visuelle Analogskala zu Schmerz/Schlaf/Stimmung, Beschwerdenliste nach von Zerssen…	Deutscher Schmerzfragebogen Verlaufsfragebogen Tagesprotokolle Kopfschmerzfragebögen nach Prof. Goebel gesamte Psychometrie	Deutscher Schmerzfragebogen, Deutsches Schmerztagebuch u.a., Entwicklung individueller Fragebögen möglich* *) Angaben wurden Internetseite entnommen, da Betreiber Fragebogen nicht beantworteten	Erhebung von vielfältigen Daten, wie z. B. Fragebogen der Deutschen Schmerzgesellschaft, psychometrische Testverfahren (ADS, SES, PDI, SF-36), Verlaufsfragebogen, Tagesfragebogen, Blockadeprotokolle, diverse Therapiedaten EDV-Programm ermöglicht Stammdaten- und Terminverwaltung, Arztbriefgenerierung sowie eine interne Qualitätssicherung und einen externen Qualitätsvergleich	Selbsterfassung von Symptomen durch den Patienten mit Hilfe des MIDOS-Bogen M (Selbsterfassung von Schmerzen, Symptomen und Allgemeinbefinden)	Schmerzbedingt beeinträchtigte Mobilisation, Respiration und/oder Schlaf Schmerzintensität und -beeinträchtigung (NRS, Behavioral Pain Score oder Kindlicher Unbehagens‐ und Schmerz‐Score nach Büttner) sowie Zeichen neuropathischer Schmerzen im Innervationsgebiet des RA‐Verfahrens	Befragung am ersten postoperativen Tag bei einer repräsentativen Patientenstichprobe: Schmerzintensität, funktionelle Beeinträchtigungen (Mobilisierung, Respiration, Schlaf, Stimmung), Nebenwirkungen, Zufriedenheit mittels validiertem Fragebogen (QUIPS-FB). Zudem werden einige demographischen Daten (z.B. Alter, Geschlecht, Station, OP) erfasst. Möglichkeit der Freifeldeingabe zusätzlicher Paramet…	Rückenschmerzen, Kopfschmerzen, Chronische Schmerzen (als Komorbiditätsfragen) Schmerzfrage aus SF-12 Schmerz-Interview für geriatrische Patienten nach Basler et al (DGSS) – nur die Schmerz-bezogenen Fragen, da eigene Fargebögen für Kognition, ADLs etc.	Schmerzskala VAS	Schmerzintensität VAS	Schmerzstärke auf einer 11er Numerischen Rating Skala PedsQL 3.0	Schmerzstärke auf einer 11er Numerischen Rating Skala SF36	Standardisierte, EDV-basierte Arztdokumentationen, standardisierte schriftliche oder EDV-basierte (iPad) Befragung der Patienten. Arzt:Erfassung von Geburtsjahr / Geschlecht, Größe / Gewicht, Krankenkasse, Nationalität, Beginn typischer Beschwerden, Betreuungs-beginn in Einrichtung, Zugangsart, Art der Betreuung / Verweildauer, Rheumatologische Hauptdiagnose, Komorbidität, Diagnosesicherheit, All…	Schmerzstärke auf einer 11er Numerischen Rating Skala 2013: Schmerzmodul für Jugendliche über 13 Jahre u.a. mit dem PedsQL Pain	Schmerz im Constant Murley Score VAS, DASH Score Schmerz im Mayo Elbow Performance Score	COMI score; Oswestry; Neck disability score; Euroquol; SRS 30; SAQ – spinal appearance questionaire	Frage zu Anzahl der Tage mit Schmerzen, AOFAS-AHS Score und optional FFI-Fußscore	NASS (Rücken) und COSS (Nacken), Outcomebögen für Bandscheibenprothesen und Ballonkyphoplastie. Core Outcome Measures Index (COMI) Rücken für interspin. Spacer und post. dynam. Stabil.systeme. EQ-5D für alle Therapien.	Schmerzmannequin aus DSF, bezogen auf die letzten 7 Tage Von-Korff-Disability Graded Back Pain, 3 Items, bezogen auf die letzten 3 Monate Schmerzintensität in 14/15 anatomischen Regionen, gemessen auf 0-10 NRS in den letzten 7 Tagen Fragen zu Kopfschmerzen Schmerzitems aus der Zerssen Beschwerdeliste diverse Schmerzfragen im Zusammenhang mit kardiovaskulären und anderen Erkrankungen	erweiterter EORTC QLQ-C-30	Instrumente, die Fragen zu Schmerzen enthalten: EORTC-QLQ-C30 EORTC-QLQ-BR23 EORTC-QLQ-CRC29 EORTC-QLQ-PR25 PHQ-D (nur Somatoforme Störungen, ohne Frage d)	EORTC QLQ_C30
Erhebung:
Periodizität:	fortlaufend	Periodizität wird durch den Arzt entschieden	fortlaufend	fortlaufend	fortlaufend	fortlaufend	fortlaufend	Am 1. postop. Tag, fakultativ Nachbefragung nach Entlassung	fortlaufend	fortlaufend postoperativ sowie nach 1, 5 u. 10 Jahren	fortlaufend	fortlaufend: 1. Jahr: vierteljährlich Erhebung; ab dem 2. Jahr: halbjährliche Erhebung; Kontrollkinder jährliche Erhebung	fortlaufend (halbjährlich)	fortlaufend (jährlich)	fortlaufend (jährlich)	fortlaufend	fortlaufend	Prä-OP, 3-6 Monate, 1 Jahr und 2 Jahre post-OP sowie weitere jährliche Kontrollen werden empfohlen – Dateneingabe erfolgt fortlaufend	fortlaufend (präoperativ und mindestens einmal postoperativ (zw. 6 Wochen bis 3 Monate) , teilweise bis zu 5 - 10 Jahre postoperativ)	fortlaufend SHIP-Basisstudie: ca. alle 5 Jahre (4. Befragung wird in 2016 abgeschlossen) SHIP-Trend: erstes Follow-up in 2016	fortlaufend	Erhebeung erfolgte zw. 2008 - 2011 Follow- up ist geplant (wenn möglich)	Ovis-Studie beendet (Follow-up durch das Institut für Krebsepidemiologie seit 2006)
erstmalig:	2010	2004	2012	2014	1998	1999	2006	2004	2009	2009	2000	2007	2007	1993	1997	Schulterendoprothesenregister: k.A. Ellenbogenendoprothesenregister: 2015	2012	2011	2005	SHIP-Basisstudie: 1998 SHIP-Trend: 2012	2009	2008	2002
zuletzt:	laufend	laufend	laufend	laufend	2004	laufend	laufend	laufend	2014/15 (Mortalität)	laufend	laufend	(Förderung bis 2021)	(Förderung zurzeit bis 2017)	2014	(Förderung zurzeit bis 2017)	laufend	laufend	laufend	laufend	laufend	2014/15 (Mortalität)	2011	2005
Veröffentlichung:
regelmäßig:	fortlaufend im Rahmen des Benchmarking	k.A.	fortlaufend im Rahmen des Benchmarking	k.A.	k.A.	Feedback an teilnehmende Einrichtungen	regelmäßig online	Feedback an teilnehmende Kliniken (inkl. Benchmarking)	entfällt	k.A.	Regelmäßig werden auf der Homepage Berichte in passwortgeschützten Bereich gestellt.	Regelmäßige Rückmeldung an Teilnehmer und beteiligte Einrichtungen mit aktuellen Ergebnissen in Form von Flyern und Informationen auf verschiedenen websites (DRFZ, Gesellschaft für Kinder- und Jugendrheumatologie).	Regelmäßige Rückmeldung an Teilnehmer und beteiligte Einrichtungen mit aktuellen Ergebnissen in Form von Flyern und Informationen auf verschiedenen websites (DRFZ, Gesellschaft für Kinder- und Jugendrheumatologie).	jährliche interne Bericht	Regelmäßige Rückmeldung an Teilnehmer mit aktuellen Ergebnissen in Form von Flyern und Informationen auf verschiedenen websites (DRFZ, Gesellschaft für Kinder- und Jugendrheumatologie) Jährliche einrichtungsspezifische Auswertungen für die teilnehmenden Kliniken und Praxen	k.A.	Rückmeldung jährlich in Form eines Registerberichtes für die Teilnehmer mit Benchmark	zweimal jährliche Publikationen bzw. zweimal jährliche Vorträge auf Fachkongressen	Jahresberichte an CH Bundesamt für Gesundheit BAG	k.A.	AMLSG Studientreffen / Tagungen / Fortbildungen	entfällt	entfällt
unregelmäßig:	k.A.	deutschsprachige und internationale Publikationen [Förster, 2013; Koroschetz, 2011; Mahn, 2011; Rehm, 2010; Baron, 2009]	Publikationen (in Bearbeitung in Kooperation mit Prof. Zenz/ Prof Trampisch von der Uni Bochum)	deutschsprachige Publikation [Überall 2015] Abfragen durch Teilnehmer jederzeit möglich	deutschsprachige Publikationen [Huppe, 2011; Frettloh, 2009; Frettloh, 2003; Nagel, 2002; Gockel, 2000]	deutschsprachige und internationale Publikationen [Jansky, 2012; Stiel, 2012; Jaspers, 2012; Neuwöhner, 2011; Lindena, 2011]	deutschsprachige und internationale Publikationen [Bomberg, 2015; Volk, 2012; Volk, 2009; Volk, 2009]	http://www.quips-projekt.de/de/veroeffentlichungen	deutschsprachige und internationale Publikationen [Klenk, 2015; Nagel, 2015; Klenk, 2015; Dallmeier, 2015; Rapp, 2014]	deutschsprachige und internationale Publikationen [Köckerling, 2015; Köckerling, 2015; Mayer, 2015; Köckerling, 2015; Köckerling, 2015]	deutschsprachige und internationale Publikationen [Klotsche, 2015; Nimmrich 2015; Horneff, 2014; Windschall, 2015; Albarouni 2014]	deutschsprachige und internationale Publikationen [Niewerth, 2013; Sengler, 2013; Lavric, 2013; Walscheid, 2013]	deutschsprachige und internationale Publikationen [Niewerth, 2014; Minden, 2014; Klotsche, 2014; Minden, 2013; Minden, 2012]	deutschsprachige und internationale Publikationen [Huscher, 2015; Albrecht, 2014; Mau, 2014; Mau, 2014, Huscher, 2013]	deutschsprachige und internationale Publikationen [Schenck, 2015; Minden, 2014; Minden, 2014; Heiligenhaus, 2013; Minden, 2012]	Rückmeldungen an Teilnehmer und Institutionen	deutschsprachige und internationale Publikationen [Aghayev, 2012; Sobottke, 2012; Meyer, 2011; Grob, 2009; Röder, 2009]	deutschsprachige Publikationen [Kostuj, 2015; Kostuj, 2014]	deutschsprachige und internationale Publikationen [Rischke, 2015; Aghayev, 2014; Hübschle, 2014; Aghayev, 2014; Spross, 2014]	deutschsprachige und internationale Publikationen [Kaul, 2015; Hoffmann, 2015; van den Berg, 2013; Völzke, 2012; Völzke, 2011]	k. A.	deutschsprachige und internationale Publikationen [Koch, 2013; Koch, 2013; Jansen, 2011] Rückmeldungen an interessierte Studienteilnehmer	deutschsprachige und internationale Publikationen [Perl, 2012; Waldmann, 2011; Waldmann, 2010; Pritzkuleit, 2008; Waldmann, 2007] Rückmeldungen an Teilnehmer und Institutionen (auf Anfrage)
Erfassungsgrad:	24 Enrichtungen mit 32 Funktionsbereichen 5165 Patienten	ca. 380.000 Patienten in 720 teilnehmenden Institutionen erfasst.	ca 35.000 Patienten	k.A.	ca. 80 schmerztherapeutische Einrichtungen ca. 200.000 Patientendatensätze erfasst	1999-Febr. 2015: Erfassung von ca. 30.000 Datensätzen (Quelle: https://www.hope-clara.de/download/HOPE2015Expose.pdf)	k.A.	200 Kliniken; 386322 Patienten-Datensätze	k.A.	mehr als 250.000 Patienten aus ca. 500 Kliniken und Praxen	ca. 4.000 Patienten erfasst	Insgesamt über 900 Patienten aus etwa 30 Einrichtungen erfasst.	Insgesamt über 1.000 Patienten aus etwa 250 Einrichtungen erfasst.	Vollerhebung in den beteiligten Einrichtungen angestrebt. Befragung von ca. 17.000 Patienten pro Jahr	Insgesamt über 45.000 Patienten (z.B. für 2013: über 10.000 Fälle) aus etwa 60 kinderrheumatologischen Einrichtungen erfasst.	Schulterendoprothesenregister: 3635 erfasste Patienten (bis 06/2015) in 46 teilnehmenden Institutionen Ellenbogenendoprothesenregister: 30 Patienten (bis 06/2015) in 7 teilnehmenden Kliniken	12.952 Patienten aus 34 Institutionen	18 Institutionen beteiligen sich von ca. 40 implantierenden Kliniken 701 Datensätze (Sept. 2014)	ca. 60 teilnehmende Institutionen	SHIP-0: 4308 Befragte [1999-2001] SHIP-1: 3320 Befragte [2002-2007] SHIP-2: 2333 Befragte [2008-2012] SHIP-3: laufend ca. 1700 Befragte [2014-2016] SHIP-Trend 0: 4420 Befragte [2008-2012]	63 Zentren 4606 Patienten (Rücklaufquote an QoL-Bögen: 37 %)	7012 Teilnehmer mit Vollfragebogen EORTC-Instrumenten, davon 6057 mit Fragebogen, der zusätzlich den PHQ umfasste	ca. 4.500 Patienten
Dokumentationsstand Datenhalter:	2015-06-19	2015-06-15	2015-07-06	2015-01-27	2015-09-23	2015-09-25	2015-04-25	2015-09-24	2015-06-16	2015-09-30	2015-04-29	2015-04-15	2015-04-15	2014-05-26	2015-04-15	2015-07-07	2015-04-15	2015-06-23	2015-04-27	2015-11-16	2015-06-22	2015-06-11	2015-06-30
